# Supplementary material
Source: PubMed Central journal article supplement (PMC8374638)
Supplement: mmc4.pdf [file mmc4.pdf]

# RELEASE\_PII\_v1

## RELEASE\_v1

Subject Label Expression: SCREENINING\_V:COVER\_F:USUBJID

Date of Birth Expression: SCREENINING\_V:DM\_F:BRTHDTC

Gender Expression:

This page intentionally left blank

## Visit Schedule

VisitCode: SCREENINING\_V VisitName: Screening, Repeats: 1

Form: COVER\_F, Registration , Single  
Form: SVSTDTC\_DAY\_F, Visit Date , Single, VisitDate eForm  
Form: IETEST\_F, Inclusion and Exclusion Criteria , Single  
Form: RFIC\_F, Informed Consent Signature , Single  
Form: COVIDTEST\_F, SARS-CoV-2 Testing , Single  
Form: DM\_F, Demographic Data , Single  
Form: SYMPTOMS\_F, Symptoms , Single  
Form: ALLERGY\_F, Allergies , Single  
Form: PREV\_MED\_F, Previous and Concomitant Medication , Single  
Form: MH\_F, Past Medical/Surgical History , Single  
Form: PEXAM\_F, Physical Examination , Single  
Form: VS\_F, Vital Signs , Single  
Form: RESPIR\_F, Respiratory Status , Single  
Form: RADIOGRAP\_F, Radiographic Findings , Single  
Form: LB\_F, Laboratory , Single  
Form: IMMUNO\_F, Markers of Immunological Function , Single  
Form: BLOOD\_SAMP\_F, Additional Blood Sample , Single  
Form: PREGNANCY\_F, Pregnancy Test , Single  
Form: NEWS\_SCALE\_F, NEWS Scale , Single  
Form: SCALE7POINT\_F, 7-Point Ordinal Scale , Single  
Form: RANDOM\_F, Randomization , Single

VisitCode: D3\_V VisitName: D3, Repeats: 1

Form: SVSTDTC\_DAY\_F, Visit Date , Single, VisitDate eForm  
Form: PEXAM\_F, Physical Examination , Single  
Form: VS\_F, Vital Signs , Single  
Form: RESPIR\_F, Respiratory Status , Single  
Form: LB\_F, Laboratory , Single  
Form: BLOOD\_SAMP\_F, Additional Blood Sample , Single  
Form: DONOR\_F, Donor Chimerism , Single  
Form: NEWS\_SCALE\_F, NEWS Scale , Single  
Form: SCALE7POINT\_F, 7-Point Ordinal Scale , Single  
Form: CM\_YN\_F, Concomitant Medication , Single  
Form: AE\_YN\_F, Adverse Events , Single

VisitCode: D7\_V VisitName: D7, Repeats: 1

Form: SVSTDTC\_DAY\_F, Visit Date , Single, VisitDate eForm  
Form: COVIDTEST\_F, SARS-CoV-2 Testing , Single  
Form: PEXAM\_F, Physical Examination , Single  
Form: VS\_F, Vital Signs , Single  
Form: RESPIR\_F, Respiratory Status , Single  
Form: LB\_F, Laboratory , Single  
Form: IMMUNO\_F, Markers of Immunological Function , Single  
Form: BLOOD\_SAMP\_F, Additional Blood Sample , Single  
Form: DONOR\_F, Donor Chimerism , Single  
Form: NEWS\_SCALE\_F, NEWS Scale , Single  
Form: SCALE7POINT\_F, 7-Point Ordinal Scale , Single  
Form: ADMIN2\_F, Second Dose , Single  
Form: CM\_YN\_F, Concomitant Medication , Single  
Form: AE\_YN\_F, Adverse Events , Single

VisitCode: D14\_V VisitName: D14, Repeats: 1

Form: SVSTDTC\_DAY\_F, Visit Date , Single, VisitDate eForm  
Form: COVIDTEST\_F, SARS-CoV-2 Testing , Single  
Form: PEXAM\_F, Physical Examination , Single  
Form: VS\_F, Vital Signs , Single  
Form: RESPIR\_F, Respiratory Status , Single  
Form: LB\_F, Laboratory , Single  
Form: IMMUNO\_F, Markers of Immunological Function , Single  
Form: BLOOD\_SAMP\_F, Additional Blood Sample , Single  
Form: DONOR\_F, Donor Chimerism , Single  
Form: NEWS\_SCALE\_F, NEWS Scale , Single  
Form: SCALE7POINT\_F, 7-Point Ordinal Scale , Single  
Form: CM\_YN\_F, Concomitant Medication , Single  
Form: AE\_YN\_F, Adverse Events , Single

VisitCode: D21\_V VisitName: D21, Repeats: 1

Form: SVSTDTC\_DAY\_F, Visit Date , Single, VisitDate eForm  
Form: COVIDTEST\_F, SARS-CoV-2 Testing , Single  
Form: PEXAM\_F, Physical Examination , Single  
Form: VS\_F, Vital Signs , Single  
Form: RESPIR\_F, Respiratory Status , Single  
Form: LB\_F, Laboratory , Single  
Form: IMMUNO\_F, Markers of Immunological Function , Single  
Form: BLOOD\_SAMP\_F, Additional Blood Sample , Single  
Form: DONOR\_F, Donor Chimerism , Single  
Form: NEWS\_SCALE\_F, NEWS Scale , Single  
Form: SCALE7POINT\_F, 7-Point Ordinal Scale , Single  
Form: CM\_YN\_F, Concomitant Medication , Single

## CASE REPORT FORM PHASE I

**A phase I/II dose-escalation multi center study to evaluate the safety of infusion of NatuRal KillEr cells or MEMory T cells as Adoptive therapy in coronavirus pnEunomia and/or lymphopenia**

### RELEASE

Center No

SITEID

Patient No

SUBJID

**Patient ID**

USUBJID

| ID | CODE    | NAME    | EXP.CODE | TYPE    | FMT/LEN | DERIVATION            | CAT. VALUES |
|----|---------|---------|----------|---------|---------|-----------------------|-------------|
| 1  | SITEID  | SITEID  | SITEID   | Text    | 3       | See Appendix          |             |
| 2  | SUBJID  | SUBJID  | SUBJID   | Integer | #9      | person:personid       |             |
| 3  | USUBJID | USUBJID | USUBJID  | Text    | 6       | SITEID & '1' & SUBJID |             |

Date

SVSTDTC

| ID | CODE    | NAME    | EXP.CODE | TYPE      | FMT/LEN                 | DERIVATION | CAT. VALUES |
|----|---------|---------|----------|-----------|-------------------------|------------|-------------|
| 1  | SVSTDTC | SVSTDTC | SVSTDTC  | Date/Time | dd/mm/yyyy,<br>Optional |            |             |

**INCLUSION AND EXCLUSION CRITERIA**

The following **INCLUSION CRITERIA SHOULD** be answered as **YES** to include the patient in the trial

1. Male and female patientes =< 80 years of age  Yes **ICTEST\_1**  
 No
2. Patients with diagnosis of COVID-19 infection with laboratory confirmation by reverse-transcription PCR (RT-PCR) of SARS-CoV-2 prior to study entry  Yes **ICTEST\_2**  
 No
3. Onset of symptoms < 12 days prior to administration of study treatment  Yes **ICTEST\_3**  
 No
4. No more than 72 hours (3 days) of hospitalization before study treatment administration  Yes **ICTEST\_4**  
 No
5. Patients requiring hospitalization with pneumonia diagnosed with chest radiograph or computed tomography imaging or lymphopenia (absolute lymphocyte counts below  $1.2 \times 10^9$  cells/L) AND O2Sat =< 94 % on room air at screening, requiring or no oxygen supplementation (nasal cannula, oxygen mask with reservoir, non-invasive ventilation, etc), but excluding mechanical ventilation  Yes **ICTEST\_5**  
 No
6. Have a negative pregnancy test documented prior to enrollment (for females of childbearing potential)  Yes **ICTEST\_6**  
 No  
 Not Applicable
7. Be willing and able to comply with study procedures  Yes **ICTEST\_7**  
 No
8. Patients with the ability to comprehend and sign the informed consent  Yes **ICTEST\_8**  
 No
9. Written informed consent obtained prior to any screening procedures  Yes **ICTEST\_9**  
 No

The following **EXCLUSION CRITERIA SHOULD** be answered as **NO** to include the patient in the trial

1. Enrolled in another Clinical Trial for COVID19  Yes **IETEST\_1**  
 No
2. Rapidly progressive disease with anticipated life-expectancy < 72 hours  Yes **IETEST\_2**  
 No
3. Patients requiring mechanical ventilation  Yes **IETEST\_3**  
 No
4. Patients with multiorgan failure  Yes **IETEST\_4**  
 No
5. Mild-moderate (grade  $\geq 3$ ) organ impairment (liver, kidney, respiratory) according to criteria from the National Cancer Institute (NCI CTCAE version 5.0)  Yes **IETEST\_5**  
 No
6. Severe and/or uncontrolled concurrent medical disease that in opinion of the investigator could cause unacceptable safety risks or compromise compliance with the protocol  Yes **IETEST\_6**  
 No
7. Have a known history of human immunodeficiency virus infection, Hepatitis B or Hepatitis C; testing is not required in the absence of prior documentation or known history  Yes **IETEST\_7**  
 No
8. Pregnant or nursing (lactating) women, where pregnancy is defined as the state of a female after conception and until the termination of gestation, confirmed by a positive hCG laboratory test  Yes **IETEST\_8**  
 No  
 Not Applicable
9. Any other condition that, in the opinion if the investigator, may interfere with the efficacy and/or safety evaluation of the trial  Yes **IETEST\_9**  
 No



| ID | CODE     | NAME     | EXP.CODE | TYPE     | FMT/LEN | DERIVATION | CAT. VALUES                  |
|----|----------|----------|----------|----------|---------|------------|------------------------------|
| 1  | ICTEST_1 | ICTEST_1 | ICTEST_1 | Category | 3       |            | 1=Yes 0=No                   |
| 2  | ICTEST_2 | ICTEST_2 | ICTEST_2 | Category | 3       |            | 1=Yes 0=No                   |
| 3  | ICTEST_3 | ICTEST_3 | ICTEST_3 | Category | 3       |            | 1=Yes 0=No                   |
| 4  | ICTEST_4 | ICTEST_4 | ICTEST_4 | Category | 3       |            | 1=Yes 0=No                   |
| 5  | ICTEST_5 | ICTEST_5 | ICTEST_5 | Category | 3       |            | 1=Yes 0=No                   |
| 6  | ICTEST_6 | ICTEST_6 | ICTEST_6 | Category | 14      |            | 1=Yes 0=No 99=Not Applicable |
| 7  | ICTEST_7 | ICTEST_7 | ICTEST_7 | Category | 3       |            | 1=Yes 0=No                   |
| 8  | ICTEST_8 | ICTEST_8 | ICTEST_8 | Category | 3       |            | 1=Yes 0=No                   |
| 9  | ICTEST_9 | ICTEST_9 | ICTEST_9 | Category | 3       |            | 1=Yes 0=No                   |
| 10 | IETEST_1 | IETEST_1 | IETEST_1 | Category | 3       |            | 1=Yes 0=No                   |
| 11 | IETEST_2 | IETEST_2 | IETEST_2 | Category | 3       |            | 1=Yes 0=No                   |
| 12 | IETEST_3 | IETEST_3 | IETEST_3 | Category | 3       |            | 1=Yes 0=No                   |
| 13 | IETEST_4 | IETEST_4 | IETEST_4 | Category | 3       |            | 1=Yes 0=No                   |
| 14 | IETEST_5 | IETEST_5 | IETEST_5 | Category | 3       |            | 1=Yes 0=No                   |
| 15 | IETEST_6 | IETEST_6 | IETEST_6 | Category | 3       |            | 1=Yes 0=No                   |
| 16 | IETEST_7 | IETEST_7 | IETEST_7 | Category | 3       |            | 1=Yes 0=No                   |
| 17 | IETEST_8 | IETEST_8 | IETEST_8 | Category | 14      |            | 1=Yes 0=No 99=Not Applicable |
| 18 | IETEST_9 | IETEST_9 | IETEST_9 | Category | 3       |            | 1=Yes 0=No                   |

## INFORMED CONSENT SIGNATURE

---

Informed Consent Signature

- No RFIC  
 Yes

| ID | CODE | NAME | EXP.CODE | TYPE     | FMT/LEN | DERIVATION | CAT. VALUES |
|----|------|------|----------|----------|---------|------------|-------------|
| 1  | RFIC | RFIC | RFIC     | Category | 3       |            | 0=No 1=Yes  |

## SARS-CoV-2 TESTING

---

Date   COVIDTESTDTC

Result  Positive COVIDTESTRESUL  
 Negative  
 Indeterminate

| ID | CODE           | NAME           | EXP.CODE       | TYPE      | FMT/LEN    | DERIVATION | CAT. VALUES                            |
|----|----------------|----------------|----------------|-----------|------------|------------|----------------------------------------|
| 1  | COVIDTESTDTC   | COVIDTESTDTC   | COVIDTESTDTC   | Date/Time | dd/mm/yyyy |            |                                        |
| 2  | COVIDTESTRESUL | COVIDTESTRESUL | COVIDTESTRESUL | Category  | 13         |            | 1=Positive 0=Negative 99=Indeterminate |

## DEMOGRAPHIC DATA

---

Date of Birth   **BRTHDTC**

Gender  Male **SEX**  
 Female

| ID | CODE    | NAME    | EXP.CODE | TYPE      | FMT/LEN    | DERIVATION | CAT. VALUES     |
|----|---------|---------|----------|-----------|------------|------------|-----------------|
| 1  | BRTHDTC | BRTHDTC | BRTHDTC  | Date/Time | dd/mm/yyyy |            |                 |
| 2  | SEX     | SEX     | SEX      | Category  | 6          |            | M=Male F=Female |

## SYMPTOMS

Symptoms start date   SYMP\_DTC

Fever > 38 °C  Yes SYMP\_FEVER  
 No  
 Unknown

Dysnea  Yes SYMP\_DYSNEA  
 No  
 Unknown

Chills  Yes SYMP\_CHILLS  
 No  
 Unknown

Nauseas  Yes SYMP\_NAUSEA  
 No  
 Unknown

Muscle pain (Mialgia)  Yes SYMP\_MUSCLEP  
 No  
 Unknown

Vomiting  Yes SYMP\_VOMIT  
 No  
 Unknown

Nasal mucus (Rhinorhea)  Yes SYMP\_NASALM  
 No  
 Unknown

Headache  Yes SYMP\_HEADP  
 No  
 Unknown

Throat pain  Yes SYMP\_THROATP  
 No  
 Unknown

Abdominal pain  Yes SYMP\_ABDOMP  
 No  
 Unknown

Cough  Yes SYMP\_COUGH  
 No  
 Unknown

Diarrhea  Yes SYMP\_DIARRH  
 No  
 Unknown

Other  Yes SYMP\_OTHER Specify  SYMP\_OTHER\_SPE  
 No  
 Unknown



| ID | CODE           | NAME           | EXP.CODE       | TYPE      | FMT/LEN    | DERIVATION | CAT. VALUES           |
|----|----------------|----------------|----------------|-----------|------------|------------|-----------------------|
| 1  | SYMP_DTC       | SYMP_DTC       | SYMP_DTC       | Date/Time | dd/mm/yyyy |            |                       |
| 2  | SYMP_FEVER     | SYMP_FEVER     | SYMP_FEVER     | Category  | 7          |            | 1=Yes 0=No 99=Unknown |
| 3  | SYMP_DYSNEA    | SYMP_DYSNEA    | SYMP_DYSNEA    | Category  | 7          |            | 1=Yes 0=No 99=Unknown |
| 4  | SYMP_CHILLS    | SYMP_CHILLS    | SYMP_CHILLS    | Category  | 7          |            | 1=Yes 0=No 99=Unknown |
| 5  | SYMP_NAUSEA    | SYMP_NAUSEA    | SYMP_NAUSEA    | Category  | 7          |            | 1=Yes 0=No 99=Unknown |
| 6  | SYMP_MUSCLEP   | SYMP_MUSCLEP   | SYMP_MUSCLEP   | Category  | 7          |            | 1=Yes 0=No 99=Unknown |
| 7  | SYMP_VOMIT     | SYMP_VOMIT     | SYMP_VOMIT     | Category  | 7          |            | 1=Yes 0=No 99=Unknown |
| 8  | SYMP_NASALM    | SYMP_NASALM    | SYMP_NASALM    | Category  | 7          |            | 1=Yes 0=No 99=Unknown |
| 9  | SYMP_HEADP     | SYMP_HEADP     | SYMP_HEADP     | Category  | 7          |            | 1=Yes 0=No 99=Unknown |
| 10 | SYMP_THROATP   | SYMP_THROATP   | SYMP_THROATP   | Category  | 7          |            | 1=Yes 0=No 99=Unknown |
| 11 | SYMP_ABDOMP    | SYMP_ABDOMP    | SYMP_ABDOMP    | Category  | 7          |            | 1=Yes 0=No 99=Unknown |
| 12 | SYMP_COUGH     | SYMP_COUGH     | SYMP_COUGH     | Category  | 7          |            | 1=Yes 0=No 99=Unknown |
| 13 | SYMP_DIARRH    | SYMP_DIARRH    | SYMP_DIARRH    | Category  | 7          |            | 1=Yes 0=No 99=Unknown |
| 14 | SYMP_OTHER     | SYMP_OTHER     | SYMP_OTHER     | Category  | 7          |            | 1=Yes 0=No 99=Unknown |
| 15 | SYMP_OTHER_SPE | SYMP_OTHER_SPE | SYMP_OTHER_SPE | Text      | 30         |            |                       |

## ALLERGIES

Are any patient allergies known, including drugs, pollen, mites, ...?

- No ALLERGY\_YN  
 Yes

Allergy

ALLERGY\_TERM

| ID                                                                                                                                                                                              | CODE         | NAME         | EXP.CODE     | TYPE     | FMT/LEN | DERIVATION | CAT. VALUES |
|-------------------------------------------------------------------------------------------------------------------------------------------------------------------------------------------------|--------------|--------------|--------------|----------|---------|------------|-------------|
| 1                                                                                                                                                                                               | ALLERGY_YN   | ALLERGY_YN   | ALLERGY_YN   | Category | 3       |            | 0=No 1=Yes  |
| Repeating Question Group: , Borders: Yes, RowStatus: No, RowNumbers: Yes, DisplayRows: 1, InitialRows: 1, Min Repeats: 0, Max Repeats: 99, Main Row Type: Single-Line, Sub Row Type: Multi-Line |              |              |              |          |         |            |             |
| 2                                                                                                                                                                                               | ALLERGY_TERM | ALLERGY_TERM | ALLERGY_TERM | Text     | 30      |            |             |

## PREVIOUS AND CONCOMITANT MEDICATION

---

Is the patient taking any medication?

- No PREV\_MED\_YN  
 Yes

Please complete the information in the Previous and Concomitant Medication form

| ID | CODE        | NAME        | EXP.CODE    | TYPE     | FMT/LEN | DERIVATION | CAT. VALUES |
|----|-------------|-------------|-------------|----------|---------|------------|-------------|
| 1  | PREV_MED_YN | PREV_MED_YN | PREV_MED_YN | Category | 3       |            | 0=No 1=Yes  |
| 2  | Hotlink     |             |             | Hotlink  |         | CM_V:CM_F  |             |

### PAST MEDICAL/SURGICAL HISTORY

Does the patient have any relevant medical or surgical history?

- No MH\_YN
- Yes

|                                                                             |                                                                            |                                                                   |
|-----------------------------------------------------------------------------|----------------------------------------------------------------------------|-------------------------------------------------------------------|
| <b>Medical and surgical history</b><br><input type="text" value="MH_TERM"/> | <input type="radio"/> Diagnoses date <input type="text" value="MH_DXDTG"/> | <b>Ongoing</b><br><input type="radio"/> No                        |
|                                                                             | <input type="radio"/> Not available <span style="color: red;">MH_DX</span> | <input type="radio"/> Yes <span style="color: red;">MH_ONG</span> |

| ID                                                                                                                                                                                              | CODE    | NAME    | EXP.CODE | TYPE      | FMT/LEN    | DERIVATION | CAT. VALUES                      |
|-------------------------------------------------------------------------------------------------------------------------------------------------------------------------------------------------|---------|---------|----------|-----------|------------|------------|----------------------------------|
| 1                                                                                                                                                                                               | MH_YN   | MH_YN   | MH_YN    | Category  | 3          |            | 0=No 1=Yes                       |
| Repeating Question Group: , Borders: Yes, RowStatus: No, RowNumbers: Yes, DisplayRows: 1, InitialRows: 1, Min Repeats: 0, Max Repeats: 99, Main Row Type: Single-Line, Sub Row Type: Multi-Line |         |         |          |           |            |            |                                  |
| 2                                                                                                                                                                                               | MH_TERM | MH_TERM | MH_TERM  | Text      | 30         |            |                                  |
| 3                                                                                                                                                                                               | MH_DX   | MH_DX   | MH_DX    | Category  | 14         |            | 1=Diagnoses date 0=Not available |
| 4                                                                                                                                                                                               | MH_DXDT | MH_DXDT | MH_DXDT  | Date/Time | dd/mm/yyyy |            |                                  |
| 5                                                                                                                                                                                               | MH_ONG  | MH_ONG  | MH_ONG   | Category  | 3          |            | 0=No 1=Yes                       |

## PHYSICAL EXAMINATION

**Body System**

If abnormal, please specify the abnormality

**Dermatologic**

- Not Done PE\_DERMA
- Normal
- Abnormal

 PE\_DERMA\_ABN

**Head and Neck**

- Not Done PE\_HEAD
- Normal
- Abnormal

 PE\_HEAD\_ABN

**Eyes, Ears, Nose & Throat**

- Not Done PE\_EYES
- Normal
- Abnormal

 PE\_EYES\_ABN

**Cardiovascular**

- Not Done PE\_CARDIO
- Normal
- Abnormal

 PE\_CARDIO\_ABN

**Respiratory**

- Not Done PE\_RESPIR
- Normal
- Abnormal

 PE\_RESPIR\_ABN

**Gastrointestinal**

- Not Done PE\_GASTRO
- Normal
- Abnormal

 PE\_GASTRO\_ABN

**Musculoskeletal**

- Not Done PE\_MUSCULO
- Normal
- Abnormal

 PE\_MUSCULO\_ABN

**Psychologic**

- Not Done PE\_PSICHO
- Normal
- Abnormal

 PE\_PSICHO\_ABN

**Other**

- Not Done PE\_OTHER
- Normal
- Abnormal

Specify the physical exam

 PE\_OTHER\_SPE
 PE\_OTHER\_ABN



| ID | CODE           | NAME           | EXP.CODE       | TYPE     | FMT/LEN | DERIVATION | CAT. VALUES                    |
|----|----------------|----------------|----------------|----------|---------|------------|--------------------------------|
| 1  | PE_DERMA       | PE_DERMA       | PE_DERMA       | Category | 8       |            | 0=Not Done 1=Normal 2=Abnormal |
| 2  | PE_DERMA_ABN   | PE_DERMA_ABN   | PE_DERMA_ABN   | Text     | 30      |            |                                |
| 3  | PE_HEAD        | PE_HEAD        | PE_HEAD        | Category | 8       |            | 0=Not Done 1=Normal 2=Abnormal |
| 4  | PE_HEAD_ABN    | PE_HEAD_ABN    | PE_HEAD_ABN    | Text     | 30      |            |                                |
| 5  | PE_EYES        | PE_EYES        | PE_EYES        | Category | 8       |            | 0=Not Done 1=Normal 2=Abnormal |
| 6  | PE_EYES_ABN    | PE_EYES_ABN    | PE_EYES_ABN    | Text     | 30      |            |                                |
| 7  | PE_CARDIO      | PE_CARDIO      | PE_CARDIO      | Category | 8       |            | 0=Not Done 1=Normal 2=Abnormal |
| 8  | PE_CARDIO_ABN  | PE_CARDIO_ABN  | PE_CARDIO_ABN  | Text     | 30      |            |                                |
| 9  | PE_RESPIR      | PE_RESPIR      | PE_RESPIR      | Category | 8       |            | 0=Not Done 1=Normal 2=Abnormal |
| 10 | PE_RESPIR_ABN  | PE_RESPIR_ABN  | PE_RESPIR_ABN  | Text     | 30      |            |                                |
| 11 | PE_GASTRO      | PE_GASTRO      | PE_GASTRO      | Category | 8       |            | 0=Not Done 1=Normal 2=Abnormal |
| 12 | PE_GASTRO_ABN  | PE_GASTRO_ABN  | PE_GASTRO_ABN  | Text     | 30      |            |                                |
| 13 | PE_MUSCULO     | PE_MUSCULO     | PE_MUSCULO     | Category | 8       |            | 0=Not Done 1=Normal 2=Abnormal |
| 14 | PE_MUSCULO_ABN | PE_MUSCULO_ABN | PE_MUSCULO_ABN | Text     | 30      |            |                                |
| 15 | PE_PSICHO      | PE_PSICHO      | PE_PSICHO      | Category | 8       |            | 0=Not Done 1=Normal 2=Abnormal |
| 16 | PE_PSICHO_ABN  | PE_PSICHO_ABN  | PE_PSICHO_ABN  | Text     | 30      |            |                                |
| 17 | PE_OTHER_SPE   | PE_OTHER_SPE   | PE_OTHER_SPE   | Text     | 30      |            |                                |
| 18 | PE_OTHER       | PE_OTHER       | PE_OTHER       | Category | 8       |            | 0=Not Done 1=Normal 2=Abnormal |
| 19 | PE_OTHER_ABN   | PE_OTHER_ABN   | PE_OTHER_ABN   | Text     | 30      |            |                                |

## VITAL SIGNS

---

Blood Pressure (mmHg)  SYSTOLIC /  DIASTOLIC

Heart Rate (bpm)  HEART\_RATE

Temperature (°C)  TEMPERATURE

Weight (kg)  WEIGHT

| ID | CODE        | NAME        | EXP.CODE    | TYPE    | FMT/LEN | DERIVATION | CAT. VALUES |
|----|-------------|-------------|-------------|---------|---------|------------|-------------|
| 1  | SYSTOLIC    | SYSTOLIC    | SYSTOLIC    | Integer | ##9     |            |             |
| 2  | DIASTOLIC   | DIASTOLIC   | DIASTOLIC   | Integer | ##9     |            |             |
| 3  | HEART_RATE  | HEART_RATE  | HEART_RATE  | Integer | ##9     |            |             |
| 4  | TEMPERATURE | TEMPERATURE | TEMPERATURE | Real    | 99.9    |            |             |
| 5  | WEIGHT      | WEIGHT      | WEIGHT      | Real    | #99.9   |            |             |

## RESPIRATORY STATUS

Respiratory Rate  Not Done RESPIR\_RATE\_NR  
 Done (bpm)  RESPIR\_RATE

SpO2 (%)  SPO2

PaO2  Not Done PAO2\_NR  
 Done (%)  PAO2

Fraction of inspired oxygen  Not Done FIO2\_NR  
 Done (%)  FIO2

Oxygen supplementation  Not used OXYGEN\_SUPP  
 Nasal cannula  
 High flow oxygen therapy  
 Mask with a reservoir bag  
 Non-invasive ventilation  
 Mechanical ventilation or ECMO

Ongoing OXYGEN\_SUPP\_ONG  
 End date   OXYGEN\_SUPP\_DTC

| ID | CODE            | NAME            | EXP.CODE        | TYPE      | FMT/LEN    | DERIVATION | CAT. VALUES          |
|----|-----------------|-----------------|-----------------|-----------|------------|------------|----------------------|
| 1  | RESPIR_RATE_NR  | RESPIR_RATE_NR  | RESPIR_RATE_NR  | Category  | 8          |            | 0=Not Done 1=Done    |
| 2  | RESPIR_RATE     | RESPIR_RATE     | RESPIR_RATE     | Integer   | #9         |            |                      |
| 3  | SPO2            | SPO2            | SPO2            | Integer   | ##9        |            |                      |
| 4  | PAO2            | PAO2            | PAO2            | Integer   | ##9        |            |                      |
| 5  | PAO2_NR         | PAO2_NR         | PAO2_NR         | Category  | 8          |            | 0=Not Done 1=Done    |
| 6  | FIO2_NR         | FIO2_NR         | FIO2_NR         | Category  | 8          |            | 0=Not Done 1=Done    |
| 7  | FIO2            | FIO2            | FIO2            | Integer   | ##9        |            |                      |
| 8  | OXYGEN_SUPP     | OXYGEN_SUPP     | OXYGEN_SUPP     | Category  | 30         |            | See Appendix         |
| 9  | OXYGEN_SUPP_ONG | OXYGEN_SUPP_ONG | OXYGEN_SUPP_ONG | Category  | 8          |            | 0=Ongoing 1=End date |
| 10 | OXYGEN_SUPP_DTC | OXYGEN_SUPP_DTC | OXYGEN_SUPP_DTC | Date/Time | dd/mm/yyyy |            |                      |

## RADIOGRAPHIC FINDINGS

- Not Done RADIOGRAP\_NR
- Done

Date   RADIOGRAPDTC

- Chest XRay RADIOGRAP\_TYPE
- Chest CT

Result  Normal RADIOGRAP\_RES  
 Abnormal

Specify the abnormality  RADIOGRAP\_ABN

| ID | CODE           | NAME           | EXP.CODE       | TYPE      | FMT/LEN    | DERIVATION | CAT. VALUES             |
|----|----------------|----------------|----------------|-----------|------------|------------|-------------------------|
| 1  | RADIOGRAP_NR   | RADIOGRAP_NR   | RADIOGRAP_NR   | Category  | 8          |            | 0=Not Done 1=Done       |
| 2  | RADIOGRAPDTC   | RADIOGRAPDTC   | RADIOGRAPDTC   | Date/Time | dd/mm/yyyy |            |                         |
| 3  | RADIOGRAP_TYPE | RADIOGRAP_TYPE | RADIOGRAP_TYPE | Category  | 10         |            | 1=Chest XRay 2=Chest CT |
| 4  | RADIOGRAP_RES  | RADIOGRAP_RES  | RADIOGRAP_RES  | Category  | 8          |            | 1=Normal 2=Abnormal     |
| 5  | RADIOGRAP_ABN  | RADIOGRAP_ABN  | RADIOGRAP_ABN  | Text      | 30         |            |                         |

## LABORATORY

Laboratory Date   LBDTC

Hematocrit  Not Done HCT\_NR  HCT  % HCT\_UNITS  NCS HCT\_CS  
 Done   Other units  HCT\_UNITSO  CS

Hemoglobin  Not Done HGB\_NR  HGB  g/dL HGB\_UNITS  NCS HGB\_CS  
 Done   g/L  CS  
 Other units  HGB\_UNITSO

MCHC  Not Done MCHC\_NR  MCHC  g/dL MCHC\_UNITS  NCS MCHC\_CS  
 Done   g/L  CS  
 Other units  MCHC\_UNITSO

MCV  Not Done MCV\_NR  MCV  mm<sup>3</sup> MCV\_UNITS  NCS MCV\_CS  
 Done   fL  CS  
 Other units  MCV\_UNITSO

Platelets  Not Done PLAT\_NR  PLAT  x10<sup>3</sup>/microL PLAT\_UNITS  NCS PLAT\_CS  
 Done   Other units  PLAT\_UNITSO  CS

Red blood cells  Not Done RBC\_NR  RBC  10<sup>6</sup>/mCL RBC\_UNITS  NCS RBC\_CS  
 Done   Other units  RBC\_UNITSO  CS

White blood cells  Not Done WBC\_NR  WBC  x 10<sup>3</sup>/UL WBC\_UNITS  NCS WBC\_CS  
 Done   x 10<sup>9</sup>/UL  CS  
 Other units  WBC\_UNITSO



| ID | CODE        | NAME        | EXP.CODE    | TYPE      | FMT/LEN    | DERIVATION | CAT. VALUES                           |
|----|-------------|-------------|-------------|-----------|------------|------------|---------------------------------------|
| 1  | LBDC        | LBDC        | LBDC        | Date/Time | dd/mm/yyyy |            |                                       |
| 2  | HCT_NR      | HCT_NR      | HCT_NR      | Category  | 8          |            | 0=Not Done 1=Done                     |
| 3  | HCT_UNITS   | HCT_UNITS   | HCT_UNITS   | Category  | 11         |            | 1=% 9=Other units                     |
| 4  | HCT_CS      | HCT_CS      | HCT_CS      | Category  | 3          |            | 0=NCS 1=CS                            |
| 5  | HCT         | HCT         | HCT         | Real      | #####9.9   |            |                                       |
| 6  | HCT_UNITSO  | HCT_UNITSO  | HCT_UNITSO  | Text      | 8          |            |                                       |
| 7  | HGB_UNITS   | HGB_UNITS   | HGB_UNITS   | Category  | 11         |            | 1=g/dL 2=g/L 9=Other units            |
| 8  | HGB_NR      | HGB_NR      | HGB_NR      | Category  | 8          |            | 0=Not Done 1=Done                     |
| 9  | HGB_CS      | HGB_CS      | HGB_CS      | Category  | 3          |            | 0=NCS 1=CS                            |
| 10 | HGB         | HGB         | HGB         | Real      | #####9.9   |            |                                       |
| 11 | HGB_UNITSO  | HGB_UNITSO  | HGB_UNITSO  | Text      | 8          |            |                                       |
| 12 | MCHC_UNITS  | MCHC_UNITS  | MCHC_UNITS  | Category  | 11         |            | 1=g/dL 2=g/L 9=Other units            |
| 13 | MCHC_NR     | MCHC_NR     | MCHC_NR     | Category  | 8          |            | 0=Not Done 1=Done                     |
| 14 | MCHC_CS     | MCHC_CS     | MCHC_CS     | Category  | 3          |            | 0=NCS 1=CS                            |
| 15 | MCHC        | MCHC        | MCHC        | Real      | #####9.9   |            |                                       |
| 16 | MCHC_UNITSO | MCHC_UNITSO | MCHC_UNITSO | Text      | 8          |            |                                       |
| 17 | MCV_UNITS   | MCV_UNITS   | MCV_UNITS   | Category  | 11         |            | 1=mm3 2=fL 9=Other units              |
| 18 | MCV_NR      | MCV_NR      | MCV_NR      | Category  | 8          |            | 0=Not Done 1=Done                     |
| 19 | MCV_CS      | MCV_CS      | MCV_CS      | Category  | 3          |            | 0=NCS 1=CS                            |
| 20 | MCV         | MCV         | MCV         | Real      | #####9.9   |            |                                       |
| 21 | MCV_UNITSO  | MCV_UNITSO  | MCV_UNITSO  | Text      | 8          |            |                                       |
| 22 | PLAT_NR     | PLAT_NR     | PLAT_NR     | Category  | 8          |            | 0=Not Done 1=Done                     |
| 23 | PLAT_UNITS  | PLAT_UNITS  | PLAT_UNITS  | Category  | 12         |            | 1=x10e3/microl 9=Other units          |
| 24 | PLAT_CS     | PLAT_CS     | PLAT_CS     | Category  | 3          |            | 0=NCS 1=CS                            |
| 25 | PLAT        | PLAT        | PLAT        | Real      | #####9.9   |            |                                       |
| 26 | PLAT_UNITSO | PLAT_UNITSO | PLAT_UNITSO | Text      | 8          |            |                                       |
| 27 | RBC_NR      | RBC_NR      | RBC_NR      | Category  | 8          |            | 0=Not Done 1=Done                     |
| 28 | RBC_UNITS   | RBC_UNITS   | RBC_UNITS   | Category  | 11         |            | 1=10e6/mCL 9=Other units              |
| 29 | RBC_CS      | RBC_CS      | RBC_CS      | Category  | 3          |            | 0=NCS 1=CS                            |
| 30 | RBC         | RBC         | RBC         | Real      | #####9.9   |            |                                       |
| 31 | RBC_UNITSO  | RBC_UNITSO  | RBC_UNITSO  | Text      | 8          |            |                                       |
| 32 | WBC_UNITS   | WBC_UNITS   | WBC_UNITS   | Category  | 11         |            | 1=x 10^3/UL 2=x 10^9/UL 9=Other units |
| 33 | WBC_NR      | WBC_NR      | WBC_NR      | Category  | 8          |            | 0=Not Done 1=Done                     |
| 34 | WBC_CS      | WBC_CS      | WBC_CS      | Category  | 3          |            | 0=NCS 1=CS                            |
| 35 | WBC         | WBC         | WBC         | Real      | #####9.9   |            |                                       |
| 36 | WBC_UNITSO  | WBC_UNITSO  | WBC_UNITSO  | Text      | 8          |            |                                       |

Basophils  Not Done BASO\_NR  Done  BASO

% BASO\_UNITS  
 x 10<sup>3</sup>/UL  
 x 10<sup>9</sup>/UL  
 Other units  BASO\_UNITSO

NCS BASO\_CS  
 CS

Eosinophils  Not Done EOS\_NR  Done  EOS

% EOS\_UNITS  
 x 10<sup>3</sup>/UL  
 x 10<sup>9</sup>/UL  
 Other units  EOS\_UNITSO

NCS EOS\_CS  
 CS

Lymphocytes  Not Done LYM\_NR  Done  LYM

% LYM\_UNITS  
 x 10<sup>3</sup>/UL  
 x 10<sup>9</sup>/UL  
 Other units  LYM\_UNITSO

NCS LYM\_CS  
 CS

Monocytes  Not Done MONO\_NR  Done  MONO

% MONO\_UNITS  
 x 10<sup>3</sup>/UL  
 x 10<sup>9</sup>/UL  
 Other units  MONO\_UNITSO

NCS MONO\_CS  
 CS

Neutrophils  Not Done NEUT\_NR  Done  NEUT

% NEUT\_UNITS  
 x 10<sup>3</sup>/UL  
 x 10<sup>9</sup>/UL  
 Other units  NEUT\_UNITSO

NCS NEUT\_CS  
 CS

Glucosa  Not Done GLU\_NR  Done  GLU

mg/dL GLU\_UNITS  
 Other units  GLU\_UNITSO

NCS GLU\_CS  
 CS

Urea  Not Done UREA\_NR  Done  UREA

mg/dL UREA\_UNITS  
 Other units  UREA\_UNITSO

NCS UREA\_CS  
 CS

| ID | CODE        | NAME        | EXP.CODE    | TYPE     | FMT/LEN  | DERIVATION | CAT. VALUES                               |
|----|-------------|-------------|-------------|----------|----------|------------|-------------------------------------------|
| 37 | BASO_UNITS  | BASO_UNITS  | BASO_UNITS  | Category | 11       |            | 1=% 2=x 10^3/UL 3=x 10^9/UL 9=Other units |
| 38 | BASO_NR     | BASO_NR     | BASO_NR     | Category | 8        |            | 0=Not Done 1=Done                         |
| 39 | BASO_CS     | BASO_CS     | BASO_CS     | Category | 3        |            | 0=NCS 1=CS                                |
| 40 | BASO        | BASO        | BASO        | Real     | #####9.9 |            |                                           |
| 41 | BASO_UNITSO | BASO_UNITSO | BASO_UNITSO | Text     | 8        |            |                                           |
| 42 | EOS_UNITS   | EOS_UNITS   | EOS_UNITS   | Category | 11       |            | 1=% 2=x 10^3/UL 3=x 10^9/UL 9=Other units |
| 43 | EOS_NR      | EOS_NR      | EOS_NR      | Category | 8        |            | 0=Not Done 1=Done                         |
| 44 | EOS_CS      | EOS_CS      | EOS_CS      | Category | 3        |            | 0=NCS 1=CS                                |
| 45 | EOS         | EOS         | EOS         | Real     | #####9.9 |            |                                           |
| 46 | EOS_UNITSO  | EOS_UNITSO  | EOS_UNITSO  | Text     | 8        |            |                                           |
| 47 | LYM_UNITS   | LYM_UNITS   | LYM_UNITS   | Category | 11       |            | 1=% 2=x 10^3/UL 3=x 10^9/UL 9=Other units |
| 48 | LYM_NR      | LYM_NR      | LYM_NR      | Category | 8        |            | 0=Not Done 1=Done                         |
| 49 | LYM_CS      | LYM_CS      | LYM_CS      | Category | 3        |            | 0=NCS 1=CS                                |
| 50 | LYM         | LYM         | LYM         | Real     | #####9.9 |            |                                           |
| 51 | LYM_UNITSO  | LYM_UNITSO  | LYM_UNITSO  | Text     | 8        |            |                                           |
| 52 | MONO_UNITS  | MONO_UNITS  | MONO_UNITS  | Category | 11       |            | 1=% 2=x 10^3/UL 3=x 10^9/UL 9=Other units |
| 53 | MONO_NR     | MONO_NR     | MONO_NR     | Category | 8        |            | 0=Not Done 1=Done                         |
| 54 | MONO_CS     | MONO_CS     | MONO_CS     | Category | 3        |            | 0=NCS 1=CS                                |
| 55 | MONO        | MONO        | MONO        | Real     | #####9.9 |            |                                           |
| 56 | MONO_UNITSO | MONO_UNITSO | MONO_UNITSO | Text     | 8        |            |                                           |
| 57 | NEUT_UNITS  | NEUT_UNITS  | NEUT_UNITS  | Category | 11       |            | 1=% 2=x 10^3/UL 3=x 10^9/UL 9=Other units |
| 58 | NEUT_NR     | NEUT_NR     | NEUT_NR     | Category | 8        |            | 0=Not Done 1=Done                         |
| 59 | NEUT_CS     | NEUT_CS     | NEUT_CS     | Category | 3        |            | 0=NCS 1=CS                                |
| 60 | NEUT        | NEUT        | NEUT        | Real     | #####9.9 |            |                                           |
| 61 | NEUT_UNITSO | NEUT_UNITSO | NEUT_UNITSO | Text     | 8        |            |                                           |
| 62 | GLU_NR      | GLU_NR      | GLU_NR      | Category | 8        |            | 0=Not Done 1=Done                         |
| 63 | GLU_UNITS   | GLU_UNITS   | GLU_UNITS   | Category | 11       |            | 1=mg/dL 9=Other units                     |
| 64 | GLU_CS      | GLU_CS      | GLU_CS      | Category | 3        |            | 0=NCS 1=CS                                |
| 65 | GLU         | GLU         | GLU         | Real     | #####9.9 |            |                                           |
| 66 | GLU_UNITSO  | GLU_UNITSO  | GLU_UNITSO  | Text     | 8        |            |                                           |
| 67 | UREA_NR     | UREA_NR     | UREA_NR     | Category | 8        |            | 0=Not Done 1=Done                         |
| 68 | UREA_UNITS  | UREA_UNITS  | UREA_UNITS  | Category | 11       |            | 1=mg/dL 9=Other units                     |
| 69 | UREA_CS     | UREA_CS     | UREA_CS     | Category | 3        |            | 0=NCS 1=CS                                |
| 70 | UREA        | UREA        | UREA        | Real     | #####9.9 |            |                                           |
| 71 | UREA_UNITSO | UREA_UNITSO | UREA_UNITSO | Text     | 8        |            |                                           |

Creatinine  Not Done CREAT\_NR  CREAT  mg/dL CREAT\_UNITS  NCS CREAT\_CS  
 Done   umol/L  CS  
 Other units  CREAT\_UNITSO

Sodium  Not Done NA\_NR  NA  mEq/L NA\_UNITS  NCS NA\_CS  
 Done   mmol/L  CS  
 Other units  NA\_UNITSO

Potassium  Not Done K\_NR  K  mEq/L K\_UNITS  NCS K\_CS  
 Done   mmol/L  CS  
 Other units  K\_UNITSO

Calcium  Not Done CA\_NR  CA  mg/dL CA\_UNITS  NCS CA\_CS  
 Done   Other units  CA\_UNITSO

Chloride  Not Done CL\_NR  CL  mEq/L CL\_UNITS  NCS CL\_CS  
 Done   mmol/L  CS  
 Other units  CL\_UNITSO

Total Protein  Not Done PROT\_NR  PROT  g/dL PROT\_UNITS  NCS PROT\_CS  
 Done   Other units  PROT\_UNITSO

Albumin  Not Done ALB\_NR  ALB  g/dL ALB\_UNITS  NCS ALB\_CS  
 Done   g/L  CS  
 Other units  ALB\_UNITSO

Total Bilirubin  Not Done BILI\_NR  BILI  mg/dL BILI\_UNITS  NCS BILI\_CS  
 Done   umol/L  CS  
 Other units  BILI\_UNITSO

Direct Bilirubin  Not Done BILDIR\_NR  BILDIR  mg/dL BILDIR\_UNITS  NCS BILDIR\_CS  
 Done   umol/L  CS  
 Other units  BILDIR\_UNITSO

| ID  | CODE          | NAME          | EXP.CODE      | TYPE     | FMT/LEN  | DERIVATION | CAT. VALUES                    |
|-----|---------------|---------------|---------------|----------|----------|------------|--------------------------------|
| 72  | CREAT_UNITS   | CREAT_UNITS   | CREAT_UNITS   | Category | 11       |            | 1=mg/dL 2=umol/L 9=Other units |
| 73  | CREAT_NR      | CREAT_NR      | CREAT_NR      | Category | 8        |            | 0=Not Done 1=Done              |
| 74  | CREAT_CS      | CREAT_CS      | CREAT_CS      | Category | 3        |            | 0=NCS 1=CS                     |
| 75  | CREAT         | CREAT         | CREAT         | Real     | #####9.9 |            |                                |
| 76  | CREAT_UNITSO  | CREAT_UNITSO  | CREAT_UNITSO  | Text     | 8        |            |                                |
| 77  | NA_UNITS      | NA_UNITS      | NA_UNITS      | Category | 11       |            | 1=mEq/L 2=mmol/L 9=Other units |
| 78  | NA_NR         | NA_NR         | NA_NR         | Category | 8        |            | 0=Not Done 1=Done              |
| 79  | NA_CS         | NA_CS         | NA_CS         | Category | 3        |            | 0=NCS 1=CS                     |
| 80  | NA            | NA            | NA            | Real     | #####9.9 |            |                                |
| 81  | NA_UNITSO     | NA_UNITSO     | NA_UNITSO     | Text     | 8        |            |                                |
| 82  | K_UNITS       | K_UNITS       | K_UNITS       | Category | 11       |            | 1=mEq/L 2=mmol/L 9=Other units |
| 83  | K_NR          | K_NR          | K_NR          | Category | 8        |            | 0=Not Done 1=Done              |
| 84  | K_CS          | K_CS          | K_CS          | Category | 3        |            | 0=NCS 1=CS                     |
| 85  | K             | K             | K             | Real     | #####9.9 |            |                                |
| 86  | K_UNITSO      | K_UNITSO      | K_UNITSO      | Text     | 8        |            |                                |
| 87  | CA_NR         | CA_NR         | CA_NR         | Category | 8        |            | 0=Not Done 1=Done              |
| 88  | CA_UNITS      | CA_UNITS      | CA_UNITS      | Category | 11       |            | 1=mg/dL 9=Other units          |
| 89  | CA_CS         | CA_CS         | CA_CS         | Category | 3        |            | 0=NCS 1=CS                     |
| 90  | CA            | CA            | CA            | Real     | #####9.9 |            |                                |
| 91  | CA_UNITSO     | CA_UNITSO     | CA_UNITSO     | Text     | 8        |            |                                |
| 92  | CL_UNITS      | CL_UNITS      | CL_UNITS      | Category | 11       |            | 1=mEq/L 2=mmol/L 9=Other units |
| 93  | CL_NR         | CL_NR         | CL_NR         | Category | 8        |            | 0=Not Done 1=Done              |
| 94  | CL_CS         | CL_CS         | CL_CS         | Category | 3        |            | 0=NCS 1=CS                     |
| 95  | CL            | CL            | CL            | Real     | #####9.9 |            |                                |
| 96  | CL_UNITSO     | CL_UNITSO     | CL_UNITSO     | Text     | 8        |            |                                |
| 97  | PROT_NR       | PROT_NR       | PROT_NR       | Category | 8        |            | 0=Not Done 1=Done              |
| 98  | PROT_UNITS    | PROT_UNITS    | PROT_UNITS    | Category | 11       |            | 1=g/dL 9=Other units           |
| 99  | PROT_CS       | PROT_CS       | PROT_CS       | Category | 3        |            | 0=NCS 1=CS                     |
| 100 | PROT          | PROT          | PROT          | Real     | #####9.9 |            |                                |
| 101 | PROT_UNITSO   | PROT_UNITSO   | PROT_UNITSO   | Text     | 8        |            |                                |
| 102 | ALB_UNITS     | ALB_UNITS     | ALB_UNITS     | Category | 11       |            | 1=g/dL 2=g/L 9=Other units     |
| 103 | ALB_NR        | ALB_NR        | ALB_NR        | Category | 8        |            | 0=Not Done 1=Done              |
| 104 | ALB_CS        | ALB_CS        | ALB_CS        | Category | 3        |            | 0=NCS 1=CS                     |
| 105 | ALB           | ALB           | ALB           | Real     | #####9.9 |            |                                |
| 106 | ALB_UNITSO    | ALB_UNITSO    | ALB_UNITSO    | Text     | 8        |            |                                |
| 107 | BILI_UNITS    | BILI_UNITS    | BILI_UNITS    | Category | 11       |            | 1=mg/dL 2=umol/L 9=Other units |
| 108 | BILI_NR       | BILI_NR       | BILI_NR       | Category | 8        |            | 0=Not Done 1=Done              |
| 109 | BILI_CS       | BILI_CS       | BILI_CS       | Category | 3        |            | 0=NCS 1=CS                     |
| 110 | BILI          | BILI          | BILI          | Real     | #####9.9 |            |                                |
| 111 | BILI_UNITSO   | BILI_UNITSO   | BILI_UNITSO   | Text     | 8        |            |                                |
| 112 | BILDIR_UNITS  | BILDIR_UNITS  | BILDIR_UNITS  | Category | 11       |            | 1=mg/dL 2=umol/L 9=Other units |
| 113 | BILDIR_NR     | BILDIR_NR     | BILDIR_NR     | Category | 8        |            | 0=Not Done 1=Done              |
| 114 | BILDIR_CS     | BILDIR_CS     | BILDIR_CS     | Category | 3        |            | 0=NCS 1=CS                     |
| 115 | BILDIR        | BILDIR        | BILDIR        | Real     | #####9.9 |            |                                |
| 116 | BILDIR_UNITSO | BILDIR_UNITSO | BILDIR_UNITSO | Text     | 8        |            |                                |

AST  Not Done AST\_NR  AST  U/L AST\_UNITS  AST\_UNITSO  NCS AST\_CS  
 Done  Other units

ALT  Not Done ALT\_NR  ALT  U/L ALT\_UNITS  ALT\_UNITSO  NCS ALT\_CS  
 Done  Other units

LDH  Not Done LDH\_NR  LDH  U/L LDH\_UNITS  LDH\_UNITSO  NCS LDH\_CS  
 Done  Other units

Ferritin  Not Done FERRITIN\_NR  FERRITIN  ug/L FERRITIN\_UNITS  FERRITIN\_UNITSO  NCS FERRITIN\_CS  
 Done  ng/mL  Other units

CRP  Not Done CRP\_NR  CRP  mg/L CRP\_UNITS  CRP\_UNITSO  NCS CRP\_CS  
 Done  Other units

Troponine  Not Done TROPONIN\_NR  TROPONIN  ng/L TROPONIN\_UNITS  TROPONIN\_UNITSO  NCS TROPONIN\_CS  
 Done  Other units

D-Dimer  Not Done DDIMER\_NR  DDIMER  ng/mL DDIMER\_UNITS  DDIMER\_UNITSO  NCS DDIMER\_CS  
 Done  Other units

Triglycerides  Not Done TRIG\_NR  TRIG  mg/dL TRIG\_UNITS  TRIG\_UNITSO  NCS TRIG\_CS  
 Done  mmol/L  Other units

Fibrinogen  Not Done FIBRINO\_NR  FIBRINO  mg/dL FIBRINO\_UNITS  FIBRINO\_UNITSO  NCS FIBRINO\_CS  
 Done  Other units

| ID  | CODE            | NAME            | EXP.CODE        | TYPE     | FMT/LEN  | DERIVATION | CAT. VALUES                    |
|-----|-----------------|-----------------|-----------------|----------|----------|------------|--------------------------------|
| 117 | AST_NR          | AST_NR          | AST_NR          | Category | 8        |            | 0=Not Done 1=Done              |
| 118 | AST_UNITS       | AST_UNITS       | AST_UNITS       | Category | 11       |            | 1=U/L 9=Other units            |
| 119 | AST_CS          | AST_CS          | AST_CS          | Category | 3        |            | 0=NCS 1=CS                     |
| 120 | AST             | AST             | AST             | Real     | #####9.9 |            |                                |
| 121 | AST_UNITSO      | AST_UNITSO      | AST_UNITSO      | Text     | 8        |            |                                |
| 122 | ALT_NR          | ALT_NR          | ALT_NR          | Category | 8        |            | 0=Not Done 1=Done              |
| 123 | ALT_UNITS       | ALT_UNITS       | ALT_UNITS       | Category | 11       |            | 1=U/L 9=Other units            |
| 124 | ALT_CS          | ALT_CS          | ALT_CS          | Category | 3        |            | 0=NCS 1=CS                     |
| 125 | ALT             | ALT             | ALT             | Real     | #####9.9 |            |                                |
| 126 | ALT_UNITSO      | ALT_UNITSO      | ALT_UNITSO      | Text     | 8        |            |                                |
| 127 | LDH_NR          | LDH_NR          | LDH_NR          | Category | 8        |            | 0=Not Done 1=Done              |
| 128 | LDH_UNITS       | LDH_UNITS       | LDH_UNITS       | Category | 11       |            | 1=U/L 9=Other units            |
| 129 | LDH_CS          | LDH_CS          | LDH_CS          | Category | 3        |            | 0=NCS 1=CS                     |
| 130 | LDH             | LDH             | LDH             | Real     | #####9.9 |            |                                |
| 131 | LDH_UNITSO      | LDH_UNITSO      | LDH_UNITSO      | Text     | 8        |            |                                |
| 132 | FERRITIN_UNITS  | FERRITIN_UNITS  | FERRITIN_UNITS  | Category | 11       |            | 1=ug/L 2=ng/mL 9=Other units   |
| 133 | FERRITIN_NR     | FERRITIN_NR     | FERRITIN_NR     | Category | 8        |            | 0=Not Done 1=Done              |
| 134 | FERRITIN_CS     | FERRITIN_CS     | FERRITIN_CS     | Category | 3        |            | 0=NCS 1=CS                     |
| 135 | FERRITIN        | FERRITIN        | FERRITIN        | Real     | #####9.9 |            |                                |
| 136 | FERRITIN_UNITSO | FERRITIN_UNITSO | FERRITIN_UNITSO | Text     | 8        |            |                                |
| 137 | CRP_NR          | CRP_NR          | CRP_NR          | Category | 8        |            | 0=Not Done 1=Done              |
| 138 | CRP_UNITS       | CRP_UNITS       | CRP_UNITS       | Category | 11       |            | 1=mg/L 9=Other units           |
| 139 | CRP_CS          | CRP_CS          | CRP_CS          | Category | 3        |            | 0=NCS 1=CS                     |
| 140 | CRP             | CRP             | CRP             | Real     | #####9.9 |            |                                |
| 141 | CRP_UNITSO      | CRP_UNITSO      | CRP_UNITSO      | Text     | 8        |            |                                |
| 142 | TROPONIN_UNITS  | TROPONIN_UNITS  | TROPONIN_UNITS  | Category | 11       |            | 1=ng/L 9=Other units           |
| 143 | TROPONIN_NR     | TROPONIN_NR     | TROPONIN_NR     | Category | 8        |            | 0=Not Done 1=Done              |
| 144 | TROPONIN_CS     | TROPONIN_CS     | TROPONIN_CS     | Category | 3        |            | 0=NCS 1=CS                     |
| 145 | TROPONIN        | TROPONIN        | TROPONIN        | Real     | #####9.9 |            |                                |
| 146 | TROPONIN_UNITSO | TROPONIN_UNITSO | TROPONIN_UNITSO | Text     | 8        |            |                                |
| 147 | DDIMER_NR       | DDIMER_NR       | DDIMER_NR       | Category | 8        |            | 0=Not Done 1=Done              |
| 148 | DDIMER_UNITS    | DDIMER_UNITS    | DDIMER_UNITS    | Category | 11       |            | 1=ng/mL 9=Other units          |
| 149 | DDIMER_CS       | DDIMER_CS       | DDIMER_CS       | Category | 3        |            | 0=NCS 1=CS                     |
| 150 | DDIMER          | DDIMER          | DDIMER          | Real     | #####9.9 |            |                                |
| 151 | DDIMER_UNITSO   | DDIMER_UNITSO   | DDIMER_UNITSO   | Text     | 8        |            |                                |
| 152 | TRIG_UNITS      | TRIG_UNITS      | TRIG_UNITS      | Category | 11       |            | 1=mg/dL 2=mmol/L 9=Other units |
| 153 | TRIG_NR         | TRIG_NR         | TRIG_NR         | Category | 8        |            | 0=Not Done 1=Done              |
| 154 | TRIG_CS         | TRIG_CS         | TRIG_CS         | Category | 3        |            | 0=NCS 1=CS                     |
| 155 | TRIG            | TRIG            | TRIG            | Real     | #####9.9 |            |                                |
| 156 | TRIG_UNITSO     | TRIG_UNITSO     | TRIG_UNITSO     | Text     | 8        |            |                                |
| 157 | FIBRINO_UNITS   | FIBRINO_UNITS   | FIBRINO_UNITS   | Category | 11       |            | 1=mg/dL 9=Other units          |
| 158 | FIBRINO_NR      | FIBRINO_NR      | FIBRINO_NR      | Category | 8        |            | 0=Not Done 1=Done              |
| 159 | FIBRINO_CS      | FIBRINO_CS      | FIBRINO_CS      | Category | 3        |            | 0=NCS 1=CS                     |
| 160 | FIBRINO         | FIBRINO         | FIBRINO         | Real     | #####9.9 |            |                                |
| 161 | FIBRINO_UNITSO  | FIBRINO_UNITSO  | FIBRINO_UNITSO  | Text     | 8        |            |                                |

IL-6

Not Done INTLK6\_NR  
 Done

INTLK6

pg/mL INTLK6\_UNITS  
 Other units

INTLK6\_UNITSO

NCS INTLK6\_CS  
 CS



| ID  | CODE          | NAME          | EXP.CODE      | TYPE     | FMT/LEN  | DERIVATION | CAT. VALUES           |
|-----|---------------|---------------|---------------|----------|----------|------------|-----------------------|
| 162 | INTLK6_UNITS  | INTLK6_UNITS  | INTLK6_UNITS  | Category | 11       |            | 1=pg/mL 9=Other units |
| 163 | INTLK6_NR     | INTLK6_NR     | INTLK6_NR     | Category | 8        |            | 0=Not Done 1=Done     |
| 164 | INTLK6_CS     | INTLK6_CS     | INTLK6_CS     | Category | 3        |            | 0=NCS 1=CS            |
| 165 | INTLK6_UNITSO | INTLK6_UNITSO | INTLK6_UNITSO | Text     | 8        |            |                       |
| 166 | INTLK6        | INTLK6        | INTLK6        | Real     | #####9.9 |            |                       |

**MARKERS OF IMMUNOLOGICAL FUNCTION**

IgG  Not Done IGG\_NR  IGG  mg/dL IGG\_UNITS  Other units  IGG\_UNITSO  
 Done

IgA  Not Done IGA\_NR  IGA  mg/dL IGA\_UNITS  Other units  IGA\_UNITSO  
 Done

IgM  Not Done IGM\_NR  IGM  mg/dL IGM\_UNITS  Other units  IGM\_UNITSO  
 Done

CD3  Not Done CD3\_NR  CD3  10e3/mCL CD3\_UNITS  Other units  CD3\_UNITSO  
 Done

CD4  Not Done CD4\_NR  CD4  10e3/mCL CD4\_UNITS  Other units  CD4\_UNITSO  
 Done

ratio CD4/CD8  Not Done CD8\_CD4\_NR  CD8\_CD4  
 Done

T cells  Not Done TCELLS\_NR  TCELLS  10e3/mCL TCELLS\_UNITS  Other units  TCELLS\_UNITSO  
 Done

CD4+ cells  Not Done CD4CELLS\_NR  CD4CELLS  10e3/mCL CD4CELLS\_UNITS  Other units  CD4CELLS\_UNITSO  
 Done

CD8+ cells  Not Done CD8\_NR  CD8  10e3/mCL CD8\_UNITS  Other units  CD8\_UNITSO  
 Done

B cells  Not Done BCELLS\_NR  
 Done

| ID | CODE            | NAME            | EXP.CODE        | TYPE     | FMT/LEN  | DERIVATION | CAT. VALUES              |
|----|-----------------|-----------------|-----------------|----------|----------|------------|--------------------------|
| 1  | IGG_NR          | IGG_NR          | IGG_NR          | Category | 8        |            | 0=Not Done 1=Done        |
| 2  | IGG_UNITS       | IGG_UNITS       | IGG_UNITS       | Category | 11       |            | 1=mg/dL 9=Other units    |
| 3  | IGG             | IGG             | IGG             | Real     | #####9.9 |            |                          |
| 4  | IGG_UNITSO      | IGG_UNITSO      | IGG_UNITSO      | Text     | 8        |            |                          |
| 5  | IGA_NR          | IGA_NR          | IGA_NR          | Category | 8        |            | 0=Not Done 1=Done        |
| 6  | IGA_UNITS       | IGA_UNITS       | IGA_UNITS       | Category | 11       |            | 1=mg/dL 9=Other units    |
| 7  | IGA             | IGA             | IGA             | Real     | #####9.9 |            |                          |
| 8  | IGA_UNITSO      | IGA_UNITSO      | IGA_UNITSO      | Text     | 8        |            |                          |
| 9  | IGM_NR          | IGM_NR          | IGM_NR          | Category | 8        |            | 0=Not Done 1=Done        |
| 10 | IGM_UNITS       | IGM_UNITS       | IGM_UNITS       | Category | 11       |            | 1=mg/dL 9=Other units    |
| 11 | IGM             | IGM             | IGM             | Real     | #####9.9 |            |                          |
| 12 | IGM_UNITSO      | IGM_UNITSO      | IGM_UNITSO      | Text     | 8        |            |                          |
| 13 | CD3_NR          | CD3_NR          | CD3_NR          | Category | 8        |            | 0=Not Done 1=Done        |
| 14 | CD3_UNITS       | CD3_UNITS       | CD3_UNITS       | Category | 11       |            | 1=10e3/mCL 9=Other units |
| 15 | CD3             | CD3             | CD3             | Real     | #####9.9 |            |                          |
| 16 | CD3_UNITSO      | CD3_UNITSO      | CD3_UNITSO      | Text     | 8        |            |                          |
| 17 | CD4_NR          | CD4_NR          | CD4_NR          | Category | 8        |            | 0=Not Done 1=Done        |
| 18 | CD4_UNITS       | CD4_UNITS       | CD4_UNITS       | Category | 11       |            | 1=10e3/mCL 9=Other units |
| 19 | CD4             | CD4             | CD4             | Real     | #####9.9 |            |                          |
| 20 | CD4_UNITSO      | CD4_UNITSO      | CD4_UNITSO      | Text     | 8        |            |                          |
| 21 | CD8_CD4_NR      | CD8_CD4_NR      | CD8_CD4_NR      | Category | 8        |            | 0=Not Done 1=Done        |
| 22 | CD8_CD4         | CD8_CD4         | CD8_CD4         | Real     | #####9.9 |            |                          |
| 23 | TCELLS_NR       | TCELLS_NR       | TCELLS_NR       | Category | 8        |            | 0=Not Done 1=Done        |
| 24 | TCELLS_UNITS    | TCELLS_UNITS    | TCELLS_UNITS    | Category | 11       |            | 1=10e3/mCL 9=Other units |
| 25 | TCELLS          | TCELLS          | TCELLS          | Real     | #####9.9 |            |                          |
| 26 | TCELLS_UNITSO   | TCELLS_UNITSO   | TCELLS_UNITSO   | Text     | 8        |            |                          |
| 27 | CD4CELLS_NR     | CD4CELLS_NR     | CD4CELLS_NR     | Category | 8        |            | 0=Not Done 1=Done        |
| 28 | CD4CELLS_UNITS  | CD4CELLS_UNITS  | CD4CELLS_UNITS  | Category | 11       |            | 1=10e3/mCL 9=Other units |
| 29 | CD4CELLS        | CD4CELLS        | CD4CELLS        | Real     | #####9.9 |            |                          |
| 30 | CD4CELLS_UNITSO | CD4CELLS_UNITSO | CD4CELLS_UNITSO | Text     | 8        |            |                          |
| 31 | CD8_NR          | CD8_NR          | CD8_NR          | Category | 8        |            | 0=Not Done 1=Done        |
| 32 | CD8_UNITS       | CD8_UNITS       | CD8_UNITS       | Category | 11       |            | 1=10e3/mCL 9=Other units |
| 33 | CD8             | CD8             | CD8             | Real     | #####9.9 |            |                          |
| 34 | CD8_UNITSO      | CD8_UNITSO      | CD8_UNITSO      | Text     | 8        |            |                          |
| 35 | BCELLS_NR       | BCELLS_NR       | BCELLS_NR       | Category | 8        |            | 0=Not Done 1=Done        |

- 10e3/mCL BCELLS\_UNITS
- Other units

| ID | CODE         | NAME         | EXP.CODE     | TYPE     | FMT/LEN | DERIVATION | CAT. VALUES              |
|----|--------------|--------------|--------------|----------|---------|------------|--------------------------|
| 36 | BCELLS_UNITS | BCELLS_UNITS | BCELLS_UNITS | Category | 11      |            | 1=10e3/mCL 9=Other units |

BCELLS

BCELLS\_UNITSO

NK cells

- Not Done  
 Done

NKCREPER\_NR

NKCREPER

- 10e3/mCL  
 Other units

NKCREPER\_UNITS

NKCREPER\_UNITSO

CD4+RA+

- Not Done  
 Done

CD4POS\_RAPOS\_NR

CD4POS\_RAPOS

- %  
 Other units

CD4P\_RAP\_UNITS

CD4P\_RAP\_UNITSO

CD4+RA-

- Not Done  
 Done

CD4POS\_RANEG\_NR

CD4POS\_RANEG

- %  
 Other units

CD4P\_RAN\_UNITS

CD4P\_RAN\_UNITSO

CD8+RA+

- Not Done  
 Done

CD8POS\_RAPOS\_NR

CD8POS\_RAPOS

- %  
 Other units

CD8P\_RAP\_UNITS

CD8P\_RAP\_UNITSO

CD8+RA-

- Not Done  
 Done

CD8POS\_RANEG\_NR

CD8POS\_RANEG

- %  
 Other units

CD8P\_RAN\_UNITS

CD8P\_RAN\_UNITSO

NKT cells

- Not Done  
 Done

NKTC\_NR

NKTC

- %  
 Other units

NKTC\_UNITS

NKTC\_UNITSO

Memory B cells

- Not Done  
 Done

MEMOBC\_NR

- %  
 Other units

MEMOBC\_UNITS

| ID | CODE            | NAME            | EXP.CODE        | TYPE     | FMT/LEN  | DERIVATION | CAT. VALUES              |
|----|-----------------|-----------------|-----------------|----------|----------|------------|--------------------------|
| 37 | BCELLS          | BCELLS          | BCELLS          | Real     | #####9.9 |            |                          |
| 38 | BCELLS_UNITSO   | BCELLS_UNITSO   | BCELLS_UNITSO   | Text     | 8        |            |                          |
| 39 | NKCREPER_NR     | NKCREPER_NR     | NKCREPER_NR     | Category | 8        |            | 0=Not Done 1=Done        |
| 40 | NKCREPER_UNITS  | NKCREPER_UNITS  | NKCREPER_UNITS  | Category | 11       |            | 1=10e3/mCL 9=Other units |
| 41 | NKCREPER        | NKCREPER        | NKCREPER        | Real     | #####9.9 |            |                          |
| 42 | NKCREPER_UNITSO | NKCREPER_UNITSO | NKCREPER_UNITSO | Text     | 8        |            |                          |
| 43 | CD4POS_RAPOS_NR | CD4POS_RAPOS_NR | CD4POS_RAPOS_NR | Category | 8        |            | 0=Not Done 1=Done        |
| 44 | CD4P_RAP_UNITS  | CD4P_RAP_UNITS  | CD4P_RAP_UNITS  | Category | 11       |            | 1=% 9=Other units        |
| 45 | CD4POS_RAPOS    | CD4POS_RAPOS    | CD4POS_RAPOS    | Real     | #####9.9 |            |                          |
| 46 | CD4P_RAP_UNITSO | CD4P_RAP_UNITSO | CD4P_RAP_UNITSO | Text     | 8        |            |                          |
| 47 | CD4POS_RANEG_NR | CD4POS_RANEG_NR | CD4POS_RANEG_NR | Category | 8        |            | 0=Not Done 1=Done        |
| 48 | CD4P_RAN_UNITS  | CD4P_RAN_UNITS  | CD4P_RAN_UNITS  | Category | 11       |            | 1=% 9=Other units        |
| 49 | CD4POS_RANEG    | CD4POS_RANEG    | CD4POS_RANEG    | Real     | #####9.9 |            |                          |
| 50 | CD4P_RAN_UNITSO | CD4P_RAN_UNITSO | CD4P_RAN_UNITSO | Text     | 8        |            |                          |
| 51 | CD8POS_RAPOS_NR | CD8POS_RAPOS_NR | CD8POS_RAPOS_NR | Category | 8        |            | 0=Not Done 1=Done        |
| 52 | CD8P_RAP_UNITS  | CD8P_RAP_UNITS  | CD8P_RAP_UNITS  | Category | 11       |            | 1=% 9=Other units        |
| 53 | CD8POS_RAPOS    | CD8POS_RAPOS    | CD8POS_RAPOS    | Real     | #####9.9 |            |                          |
| 54 | CD8P_RAP_UNITSO | CD8P_RAP_UNITSO | CD8P_RAP_UNITSO | Text     | 8        |            |                          |
| 55 | CD8POS_RANEG_NR | CD8POS_RANEG_NR | CD8POS_RANEG_NR | Category | 8        |            | 0=Not Done 1=Done        |
| 56 | CD8P_RAN_UNITS  | CD8P_RAN_UNITS  | CD8P_RAN_UNITS  | Category | 11       |            | 1=% 9=Other units        |
| 57 | CD8POS_RANEG    | CD8POS_RANEG    | CD8POS_RANEG    | Real     | #####9.9 |            |                          |
| 58 | CD8P_RAN_UNITSO | CD8P_RAN_UNITSO | CD8P_RAN_UNITSO | Text     | 8        |            |                          |
| 59 | NKTC_NR         | NKTC_NR         | NKTC_NR         | Category | 8        |            | 0=Not Done 1=Done        |
| 60 | NKTC_UNITS      | NKTC_UNITS      | NKTC_UNITS      | Category | 11       |            | 1=% 9=Other units        |
| 61 | NKTC            | NKTC            | NKTC            | Real     | #####9.9 |            |                          |
| 62 | NKTC_UNITSO     | NKTC_UNITSO     | NKTC_UNITSO     | Text     | 8        |            |                          |
| 63 | MEMOBC_NR       | MEMOBC_NR       | MEMOBC_NR       | Category | 8        |            | 0=Not Done 1=Done        |
| 64 | MEMOBC_UNITS    | MEMOBC_UNITS    | MEMOBC_UNITS    | Category | 11       |            | 1=% 9=Other units        |

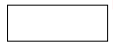

MEMOBC



| ID | CODE   | NAME   | EXP.CODE | TYPE | FMT/LEN  | DERIVATION | CAT. VALUES |
|----|--------|--------|----------|------|----------|------------|-------------|
| 65 | MEMOBC | MEMOBC | MEMOBC   | Real | #####9.9 |            |             |

MEMOBC\_UNITSO

T cells GD

Not Done ACTTC\_NR  
 Done

ACTTC

% ACTTC\_UNITS  
 Other units

ACTTC\_UNITSO

T regs

Not Done TREGS\_NR  
 Done

TREGS

% TREGS\_UNITS  
 Other units

TREGS\_UNITSO

CD3+HLADR+

Not Done CD3\_HLADR\_NR  
 Done

CD3\_HLADR

% CD3\_HLADR\_UNITS  
 Other units

CD3HLADR\_UNITSO

ratio Treg/Tcon

Not Done TGEN\_TCON\_NR  
 Done

TGEN\_TCON

| ID | CODE            | NAME             | EXP.CODE        | TYPE     | FMT/LEN  | DERIVATION | CAT. VALUES       |
|----|-----------------|------------------|-----------------|----------|----------|------------|-------------------|
| 66 | MEMOBC_UNITSO   | MEMOBC_UNITSO    | MEMOBC_UNITSO   | Text     | 8        |            |                   |
| 67 | ACTTC_NR        | ACTTC_NR         | ACTTC_NR        | Category | 8        |            | 0=Not Done 1=Done |
| 68 | ACTTC_UNITS     | ACTTC_UNITS      | ACTTC_UNITS     | Category | 11       |            | 1=% 9=Other units |
| 69 | ACTTC           | ACTTC            | ACTTC           | Real     | #####9.9 |            |                   |
| 70 | ACTTC_UNITSO    | ACTTC_UNITSO     | ACTTC_UNITSO    | Text     | 8        |            |                   |
| 71 | TREGS_NR        | TREGS_NR         | TREGS_NR        | Category | 8        |            | 0=Not Done 1=Done |
| 72 | TREGS_UNITS     | TREGS_UNITS      | TREGS_UNITS     | Category | 11       |            | 1=% 9=Other units |
| 73 | TREGS           | TREGS            | TREGS           | Real     | #####9.9 |            |                   |
| 74 | TREGS_UNITSO    | TREGS_UNITSO     | TREGS_UNITSO    | Text     | 8        |            |                   |
| 75 | CD3_HLADR_NR    | CD3_HLADR_NR     | CD3_HLADR_NR    | Category | 8        |            | 0=Not Done 1=Done |
| 76 | CD3_HLADR_UNITS | CD3_HLADR_UNITS  | CD3_HLADR_UNITS | Category | 11       |            | 1=% 9=Other units |
| 77 | CD3_HLADR       | CD3_HLADR        | CD3_HLADR       | Real     | #####9.9 |            |                   |
| 78 | CD3HLADR_UNITSO | CD3_HLADR_UNITSO | CD3HLADR_UNITSO | Text     | 8        |            |                   |
| 79 | TGEN_TCON_NR    | TGEN_TCON_NR     | TGEN_TCON_NR    | Category | 8        |            | 0=Not Done 1=Done |
| 80 | TGEN_TCON       | TGEN_TCON        | TGEN_TCON       | Real     | #####9.9 |            |                   |

## BLOOD SAMPLE FOR ADDITIONAL INVESTIGATIONAL STUDIES

---

Blood sample for additional investigational studies has been extracted?

- Yes BLOOD\_SAMP\_YN  
 No

| ID | CODE          | NAME          | EXP.CODE      | TYPE     | FMT/LEN | DERIVATION | CAT. VALUES |
|----|---------------|---------------|---------------|----------|---------|------------|-------------|
| 1  | BLOOD_SAMP_YN | BLOOD_SAMP_YN | BLOOD_SAMP_YN | Category | 3       |            | 1=Yes 0=No  |

## DONOR CHIMERISM

---

- No Realizado DCHIMERISM\_NR
- Realizado

Donor Chimerism (%)

 DONOR\_CHIMERISM

| ID | CODE            | NAME            | EXP.CODE        | TYPE     | FMT/LEN   | DERIVATION | CAT. VALUES                |
|----|-----------------|-----------------|-----------------|----------|-----------|------------|----------------------------|
| 1  | DCHIMERISM_NR   | DCHIMERISM_NR   | DCHIMERISM_NR   | Category | 12        |            | 0=No Realizado 1=Realizado |
| 2  | DONOR_CHIMERISM | DONOR_CHIMERISM | DONOR_CHIMERISM | Real     | ###9.9### |            |                            |

## PREGNANCY TEST

---

Not Done PREGNANCY\_NR  
 Done

Urine PREGNANCY\_TYPE  
 Blood

Negative PREGNANCY\_RES  
 Positive



| ID | CODE           | NAME           | EXP.CODE       | TYPE     | FMT/LEN | DERIVATION | CAT. VALUES           |
|----|----------------|----------------|----------------|----------|---------|------------|-----------------------|
| 1  | PREGNANCY_NR   | PREGNANCY_NR   | PREGNANCY_NR   | Category | 8       |            | 0=Not Done 1=Done     |
| 2  | PREGNANCY_TYPE | PREGNANCY_TYPE | PREGNANCY_TYPE | Category | 5       |            | 1=Urine 2=Blood       |
| 3  | PREGNANCY_RES  | PREGNANCY_RES  | PREGNANCY_RES  | Category | 8       |            | 0=Negative 1=Positive |

## NEWS SCALE

---

- Not Done NEWS\_SCALE\_NR
- Done

Points

NEWS\_SCALE

| ID | CODE          | NAME          | EXP.CODE      | TYPE     | FMT/LEN | DERIVATION | CAT. VALUES       |
|----|---------------|---------------|---------------|----------|---------|------------|-------------------|
| 1  | NEWS_SCALE_NR | NEWS_SCALE_NR | NEWS_SCALE_NR | Category | 8       |            | 0=Not Done 1=Done |
| 2  | NEWS_SCALE    | NEWS_SCALE    | NEWS_SCALE    | Integer  | #9      |            |                   |

## 7-POINT ORDINAL SCALE

---

- Not Done SCALE7POINT\_NR
- Done

- Discharged (or ready for discharge as evidenced by normal body temperature and respiratory rate, and stable oxygen saturation on ambient air)
- Non-ICU hospital ward (or ready for hospital ward) not requiring supplemental oxygen
- Non-ICU hospital ward (or ready for hospital ward) requiring supplemental oxygen
- ICU or non-ICU hospital ward, requiring non-invasive ventilation or high-flow oxygen
- ICU, requiring intubation and mechanical ventilation
- ICU, requiring ECMO or mechanical ventilation and additional organ support (e.g., vasopressors, renal replacement therapy)
- Death

| ID | CODE           | NAME           | EXP.CODE       | TYPE     | FMT/LEN | DERIVATION | CAT. VALUES       |
|----|----------------|----------------|----------------|----------|---------|------------|-------------------|
| 1  | SCALE7POINT_NR | SCALE7POINT_NR | SCALE7POINT_NR | Category | 8       |            | 0=Not Done 1=Done |
| 2  | SCALE7POINT    | SCALE7POINT    | SCALE7POINT    | Category | 171     |            | See Appendix      |

## RANDOMIZATION

---

Randomization Date

RANDOM\_DTC

- Standard of Care (SoC) ARM
- Standard of Care (SoC) + Recommended Phase II Dose (RP2D)

| ID | CODE       | NAME       | EXP.CODE   | TYPE      | FMT/LEN    | DERIVATION | CAT. VALUES  |
|----|------------|------------|------------|-----------|------------|------------|--------------|
| 1  | RANDOM_DTC | RANDOM_DTC | RANDOM_DTC | Date/Time | dd/mm/yyyy |            |              |
| 2  | ARM        | ARM        | ARM        | Category  | 56         |            | See Appendix |

**SECOND DOSE**

---

A second dose has been administrated?

- Yes ADMIN2\_YN
- No



| ID | CODE      | NAME      | EXP.CODE  | TYPE     | FMT/LEN | DERIVATION | CAT. VALUES |
|----|-----------|-----------|-----------|----------|---------|------------|-------------|
| 1  | ADMIN2_YN | ADMIN2_YN | ADMIN2_YN | Category | 3       |            | 1=Yes 0=No  |

## PATIENT EVOLUTION

Has the patient suffer any symptoms?  No SYMP\_YN  
 Yes

Specify

 SYMP\_SPEC

Has the patient suffer any complications after discharge?  No COMPLI\_YN  
 Yes

Specify

 COMPLI\_SPEC

| ID | CODE        | NAME        | EXP.CODE    | TYPE     | FMT/LEN | DERIVATION | CAT. VALUES |
|----|-------------|-------------|-------------|----------|---------|------------|-------------|
| 1  | SYMP_YN     | SYMP_YN     | SYMP_YN     | Category | 3       |            | 0=No 1=Yes  |
| 2  | SYMP_SPEC   | SYMP_SPEC   | SYMP_SPEC   | Text     | 50      |            |             |
| 3  | COMPLI_YN   | COMPLI_YN   | COMPLI_YN   | Category | 3       |            | 0=No 1=Yes  |
| 4  | COMPLI_SPEC | COMPLI_SPEC | COMPLI_SPEC | Text     | 50      |            |             |

## CONCOMITANT MEDICATION

---

Has the patient taken any new Concomitant Medication?

- No CM\_YN  
 Yes

Please complete the information in the Previous and Concomitant Medication

| ID | CODE    | NAME  | EXP.CODE | TYPE     | FMT/LEN | DERIVATION | CAT. VALUES |
|----|---------|-------|----------|----------|---------|------------|-------------|
| 1  | CM_YN   | CM_YN | CM_YN    | Category | 3       |            | 0=No 1=Yes  |
| 2  | Hotlink |       |          | Hotlink  |         | CM_V:CM_F  |             |

## ADVERSE EVENTS

---

Has the patient suffered any Adverse Event?

- No AE\_YN  
 Yes

Please complete the information in the Adverse Events form

| ID | CODE    | NAME  | EXP.CODE | TYPE     | FMT/LEN | DERIVATION | CAT. VALUES |
|----|---------|-------|----------|----------|---------|------------|-------------|
| 1  | AE_YN   | AE_YN | AE_YN    | Category | 3       |            | 0=No 1=Yes  |
| 2  | Hotlink |       |          | Hotlink  |         | AE_V:AE_F  |             |

## END OF STUDY REASON

- Ineligibility
- Withdrawal of consent
- Discharge from the hospital/institution
- Concomitant illness
- Toxicity
- Subject request to discontinue
- Subject's non-compliance
- Pregnancy
- Death
- Day 90
- Other

EOS\_REASON

Discharge date

DISCHARGE\_DTC

EOS\_REASON\_SPE



| ID | CODE           | NAME           | EXP.CODE       | TYPE      | FMT/LEN    | DERIVATION | CAT. VALUES  |
|----|----------------|----------------|----------------|-----------|------------|------------|--------------|
| 1  | EOS_REASON     | EOS_REASON     | EOS_REASON     | Category  | 39         |            | See Appendix |
| 2  | DISCHARGE_DTC  | DISCHARGE_DTC  | DISCHARGE_DTC  | Date/Time | dd/mm/yyyy |            |              |
| 3  | EOS_REASON_SPE | EOS_REASON_SPE | EOS_REASON_SPE | Text      | 30         |            |              |

## PATIENT RECOVERY

---

No fever patient date

ASYMPTOM\_DTC

SatO2 normalization date (> 94% for 24 hours)

NORMAL\_SPO2\_DTC

| ID | CODE            | NAME            | EXP.CODE        | TYPE      | FMT/LEN    | DERIVATION | CAT. VALUES |
|----|-----------------|-----------------|-----------------|-----------|------------|------------|-------------|
| 1  | ASYMPTOM_DTC    | ASYMPTOM_DTC    | ASYMPTOM_DTC    | Date/Time | dd/mm/yyyy |            |             |
| 2  | NORMAL_SPO2_DTC | NORMAL_SPO2_DTC | NORMAL_SPO2_DTC | Date/Time | dd/mm/yyyy |            |             |

## PRINCIPAL INVESTIGATOR SIGNATURE

---

I reviewed this eCRF and confirm that the information completed in this eCRF is complete and accurate data and accurately reflect the information of this patient. I confirm that the study was carried out according to the protocol of the same and the informed consent was obtained in writing before the beginning of the study.

Reviewed RVWD

Principal Investigator Name

RVWD\_BY

Date

RVWDDTC

| ID | CODE    | NAME    | EXP.CODE | TYPE      | FMT/LEN    | DERIVATION     | CAT. VALUES |
|----|---------|---------|----------|-----------|------------|----------------|-------------|
| 1  | RVWD    | RVWD    | RVWD     | Category  | 8          |                | 1=Reviewed  |
| 2  | RVWD_BY | RVWD_BY | RVWD_BY  | Text      | 50         | user:username  |             |
| 3  | RVWDDTC | RVWDDTC | RVWDDTC  | Date/Time | dd/mm/yyyy | dateof( RVWD ) |             |

### PREVIOUS AND CONCOMITANT MEDICATION

| Medication                     | Indication | Dose   | Units   | Frequency | Route    |                                           |
|--------------------------------|------------|--------|---------|-----------|----------|-------------------------------------------|
| CM_TRT                         | CM_IND     | CM_DOS | CM_DOSU | CM_DOSFRQ | CM_ROUTE |                                           |
| <input type="radio"/> End Date | CM_ENDDTC  |        |         |           |          | <input type="radio"/> Start Date CM_STDTC |
| <input type="radio"/> Ongoing  | CM_END     |        |         |           |          | <input type="radio"/> Not available CM_ST |

| ID                                                                                                                                                                                              | CODE      | NAME      | EXP.CODE  | TYPE      | FMT/LEN    | DERIVATION | CAT. VALUES                  |
|-------------------------------------------------------------------------------------------------------------------------------------------------------------------------------------------------|-----------|-----------|-----------|-----------|------------|------------|------------------------------|
| Repeating Question Group: , Borders: Yes, RowStatus: No, RowNumbers: Yes, DisplayRows: 1, InitialRows: 1, Min Repeats: 0, Max Repeats: 99, Main Row Type: Single-Line, Sub Row Type: Multi-Line |           |           |           |           |            |            |                              |
| 1                                                                                                                                                                                               | CM_TRT    | CM_TRT    | CM_TRT    | Text      | 30         |            |                              |
| 2                                                                                                                                                                                               | CM_IND    | CM_IND    | CM_IND    | Text      | 30         |            |                              |
| 3                                                                                                                                                                                               | CM_DOSE   | CM_DOSE   | CM_DOSE   | Text      | 8          |            |                              |
| 4                                                                                                                                                                                               | CM_DOSU   | CM_DOSU   | CM_DOSU   | Text      | 8          |            |                              |
| 5                                                                                                                                                                                               | CM_DOSFRQ | CM_DOSFRQ | CM_DOSFRQ | Category  | 14         |            | See Appendix                 |
| 6                                                                                                                                                                                               | CM_ROUTE  | CM_ROUTE  | CM_ROUTE  | Category  | 20         |            | See Appendix                 |
| 7                                                                                                                                                                                               | CM_ST     | CM_ST     | CM_ST     | Category  | 13         |            | 1=Start Date 0=Not available |
| 8                                                                                                                                                                                               | CM_STDTC  | CM_STDTC  | CM_STDTC  | Date/Time | dd/mm/yyyy |            |                              |
| 9                                                                                                                                                                                               | CM_END    | CM_END    | CM_END    | Category  | 8          |            | 1=End Date 0=Ongoing         |
| 10                                                                                                                                                                                              | CM_ENDDTC | CM_ENDDTC | CM_ENDDTC | Date/Time | dd/mm/yyyy |            |                              |

### ADVERSE EVENTS

|                                                                                       |                                                                                                          |                                                                                                                      |                                                                                                                                                                                                                         |                                                                                                                               |                                                                                                         |                                                                                                                                                      |
|---------------------------------------------------------------------------------------|----------------------------------------------------------------------------------------------------------|----------------------------------------------------------------------------------------------------------------------|-------------------------------------------------------------------------------------------------------------------------------------------------------------------------------------------------------------------------|-------------------------------------------------------------------------------------------------------------------------------|---------------------------------------------------------------------------------------------------------|------------------------------------------------------------------------------------------------------------------------------------------------------|
| <b>Adverse Event Description</b><br><input type="text" value="AE_TERM"/>              | <b>Onset Date</b><br><input type="text" value="AE_STDTC"/>                                               | <input type="radio"/> End Date <input type="text" value="AE_ENDDTC"/><br><input type="radio"/> Ongoing <b>AE_END</b> | <b>Severity (CTCAE v5 Grade)</b><br><input type="radio"/> Mild<br><input type="radio"/> Moderate<br><input type="radio"/> Severe<br><input type="radio"/> Life-threatening<br><input type="radio"/> Death <b>AE_SEV</b> | <b>Relationship to Study Intervention</b><br><input type="radio"/> Related<br><input type="radio"/> Not Related <b>AE_REL</b> | <b>Expectedness</b><br><input type="radio"/> Expected<br><input type="radio"/> Unexpected <b>AE_EXP</b> | <b>Outcome</b><br><input type="radio"/> Recovering<br><input type="radio"/> Recovered<br><input type="radio"/> Recovered with sequelae <b>AE_OUT</b> |
| <b>Serious</b><br><input type="radio"/> No<br><input type="radio"/> Yes <b>AE_SER</b> | <b>Treatment for the Event</b><br><input type="radio"/> No<br><input type="radio"/> Yes <b>AE_CONTRT</b> |                                                                                                                      |                                                                                                                                                                                                                         |                                                                                                                               |                                                                                                         |                                                                                                                                                      |



| ID                                                                                                                                                                                              | CODE      | NAME      | EXP.CODE  | TYPE      | FMT/LEN    | DERIVATION | CAT. VALUES                                           |
|-------------------------------------------------------------------------------------------------------------------------------------------------------------------------------------------------|-----------|-----------|-----------|-----------|------------|------------|-------------------------------------------------------|
| Repeating Question Group: , Borders: Yes, RowStatus: No, RowNumbers: Yes, DisplayRows: 1, InitialRows: 1, Min Repeats: 0, Max Repeats: 99, Main Row Type: Single-Line, Sub Row Type: Multi-Line |           |           |           |           |            |            |                                                       |
| 1                                                                                                                                                                                               | AE_TERM   | AE_TERM   | AE_TERM   | Text      | 30         |            |                                                       |
| 2                                                                                                                                                                                               | AE_STDTC  | AE_STDTC  | AE_STDTC  | Date/Time | dd/mm/yyyy |            |                                                       |
| 3                                                                                                                                                                                               | AE_END    | AE_END    | AE_END    | Category  | 8          |            | 1=End Date 0=Ongoing                                  |
| 4                                                                                                                                                                                               | AE_ENDDTC | AE_ENDDTC | AE_ENDDTC | Date/Time | dd/mm/yyyy |            |                                                       |
| 5                                                                                                                                                                                               | AE_SEV    | AE_SEV    | AE_SEV    | Category  | 16         |            | 1=Mild 2=Moderate 3=Severe 4=Life-threatening 5=Death |
| 6                                                                                                                                                                                               | AE_REL    | AE_REL    | AE_REL    | Category  | 11         |            | 1=Related 0=Not Related                               |
| 7                                                                                                                                                                                               | AE_EXP    | AE_EXP    | AE_EXP    | Category  | 10         |            | 1=Expected 0=Unexpected                               |
| 8                                                                                                                                                                                               | AE_OUT    | AE_OUT    | AE_OUT    | Category  | 23         |            | 1=Recovering 2=Recovered 3=Recovered with sequelae    |
| 9                                                                                                                                                                                               | AE_SER    | AE_SER    | AE_SER    | Category  | 3          |            | 0=No 1=Yes                                            |
| 10                                                                                                                                                                                              | AE_CONTRT | AE_CONTRT | AE_CONTRT | Category  | 3          |            | 0=No 1=Yes                                            |

| CODE        | NAME        | TYPE            | EXPRESSION                                                                                                                                                                                                                                                                                                                                                                                                                                                                                                                                                                                                                               |
|-------------|-------------|-----------------|------------------------------------------------------------------------------------------------------------------------------------------------------------------------------------------------------------------------------------------------------------------------------------------------------------------------------------------------------------------------------------------------------------------------------------------------------------------------------------------------------------------------------------------------------------------------------------------------------------------------------------------|
| ARM         | ARM         | Category Values | 0=Standard of Care (SoC) 1=Standard of Care (SoC) + Recommended Phase II Dose (RP2D)                                                                                                                                                                                                                                                                                                                                                                                                                                                                                                                                                     |
| CM_DOSFRQ   | CM_DOSFRQ   | Category Values | Q24H=Every 24 hours Q12H=Every 12 hours Q8H=Every 8 hours Q6H=Every 6 hours Q4H=Every 4 hours PRN=As needed QM=Every Month                                                                                                                                                                                                                                                                                                                                                                                                                                                                                                               |
| CM_ROUTE    | CM_ROUTE    | Category Values | IM=Intramuscular Route IV=Intravenous Route VB=Buccal Route VIC=Intracavernous Route VINH=Inhalation Route VO=Oral Route VOF=Ophthalmic Route VP=Parenteral Route VR=Rectal Route VSC=Subcutaneous Route VSI=Sublingual Route VT=Topical Route VTD=Transdermal Route VV=Vaginal Route                                                                                                                                                                                                                                                                                                                                                    |
| EOS_REASON  | EOS_REASON  | Category Values | 1=Ineligibility 2=Withdrawal of consent 3=Discharge from the hospital/institution 4=Concomitant illness 5=Toxicity 6=Subject request to discontinue 7=Subject's non-compliance 8=Pregnancy 9=Death 10=Day 90 11=Other                                                                                                                                                                                                                                                                                                                                                                                                                    |
| OXYGEN_SUPP | OXYGEN_SUPP | Category Values | 0=Not used 1=Nasal cannula 2=High flow oxygen therapy 3=Mask with a reservoir bag 4=Non-invasive ventilation 5=Mechanical ventilation or ECMO                                                                                                                                                                                                                                                                                                                                                                                                                                                                                            |
| SCALE7POINT | SCALE7POINT | Category Values | 1=Discharged (or ready for discharge as evidenced by normal body temperature and respiratory rate, and stable oxygen saturation on ambient air or < 2L supplemental oxygen) 2=Non-ICU hospital ward (or ready for hospital ward) not requiring supplemental oxygen 3=Non-ICU hospital ward (or ready for hospital ward) requiring supplemental oxygen 4=ICU or non-ICU hospital ward, requiring non-invasive ventilation or high-flow oxygen 5=ICU, requiring intubation and mechanical ventilation 6=ICU, requiring ECMO or mechanical ventilation and additional organ support (e.g., vasopressors, renal replacement therapy) 7=Death |
| SITEID      | SITEID      | Derivation      | <pre> case(   (person:trialsite = 'demo', '000'),   (person:trialsite = 'hlapaz', '001'),   (person:trialsite = 'hryc', '002'),   (person:trialsite = 'hcruces', '003'),   (person:trialsite = 'hgaldak', '004'),   (person:trialsite = 'hcvai', '005'),   (person:trialsite = 'halicant', '006') ) </pre>                                                                                                                                                                                                                                                                                                                               |
